# Supplementary material for: Aluminum–air battery based on an ionic liquid electrolyte
Source: Royal Society of Chemistry journal article supplement (doi:10.1039/c4ta04721d), 2014-01-01
Supplement: c4ta04721d1.pdf [file c4ta04721d1.pdf]

**Electronic Supplementary Information:**  
**Aluminum-Air Battery Based on Ionic Liquid Electrolyte**

D. Gelman<sup>a,b</sup>, B. Shvartsev<sup>b</sup> and Y. Ein-Eli<sup>a,b</sup>

<sup>a</sup> The Nancy and Stephen Grand Technion Energy Program, Technion- Israel Institute of Technology, Haifa Israel 3200003

<sup>b</sup> Department of Materials Science and Engineering, Technion- Israel Institute of Technology, Haifa Israel 3200003

**Electronic Supplementary Information Contents:**

1. Electrochemical cell
2. XPS Studies
3. Aluminum termination
4. Aluminum capacity calculation

## 1. Electrochemical cell

Fc/Fc<sup>+</sup> gel based electrode (RE)

Fc/Fc<sup>+</sup> gel based electrode (RE)

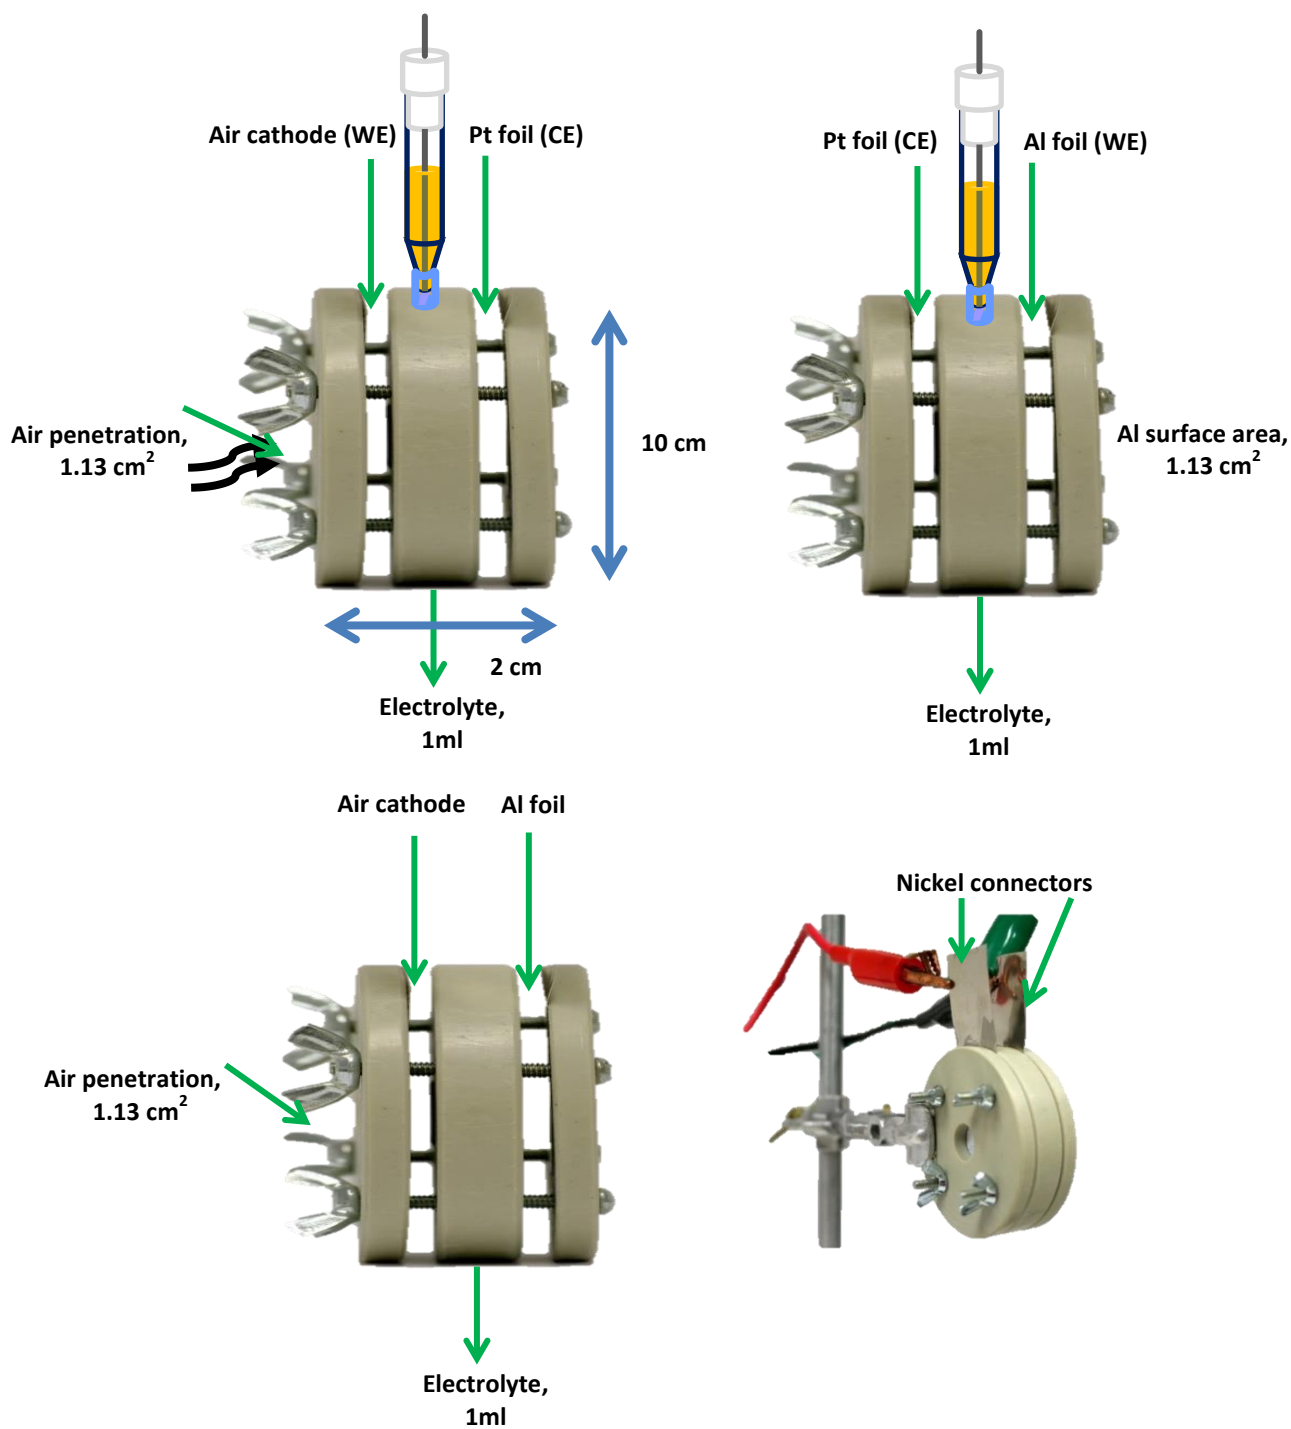

Figure. 1S. The electrochemical cells applied for the presented studies

## 2. XPS Studies

Surface analysis of the air electrode was conducted by XPS (Thermo VG Scientific, Sigma probe, GB) having a base pressure of  $<10^{-9}$  Torr and fitted with a mono-chromatized Al KR (1486.6 eV) X-ray source. The detailed spectra of Al 2p were measured with the pass-energy of 20 eV and step size of 0.05 eV. Spectra were acquired and processed by the XPS Peak Fit software and referenced to the C 1s peak at 285.0 eV. Peak area intensity data were obtained after Shirley type background subtraction. Peak decomposition of the complex lines was performed by peak synthesis method, using mixed Gaussian–Lorentzian peak shape, while minimizing the error between the actual data and the sum of the deconvoluted peaks. Peak fitting solutions were sought for  $\chi^2 < 1$ , where  $\chi^2$  is the standard deviation.

## 3. Aluminum termination

(a)  $t=0$

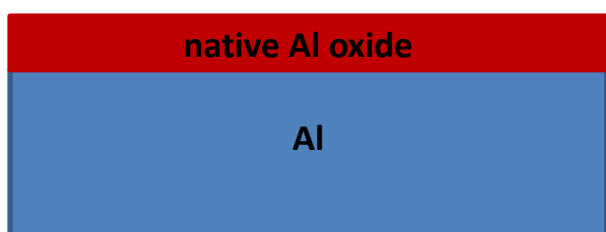

(b)  $t>0$

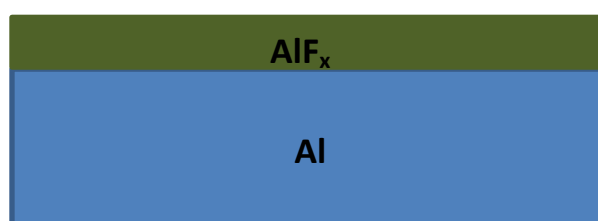

**Figure. 2S.** Schematic representation of the termination process:

(a) Native Al oxide presented in the initial exposure of the surface to the electrolyte, (b) oxide dissolution and  $AlF_x$  formation on the Al surface.

## 4. Al capacity calculation

### 4.1. Aluminum electrode theoretical capacity

The Al theoretical capacity was calculated as follow:

$Al_{weight} = Al_{volume} \cdot Al_{density} = 1.13 \text{ cm}^2 \text{ (exposed Al area)} \cdot 0.025 \text{ cm (foil thickness)} \cdot 2.7 \text{ gr/cm}^3 \text{ (Al density)} = 0.0762 \text{ gr}$ .

Applying Faraday's law for theoretical capacity (Q) of the Al electrode is given by:

$$Q = \frac{nFM}{Mw} = \frac{3e^- \cdot 0.0762 [\text{gr}] \cdot 96485 [\frac{C}{\text{mol} \cdot e^-}]}{27 [\text{gr/mol}]} = 816.91 [C] = 226.9 [mAh]$$

Where: F-Faraday constant, n-number of electrons passing in the reaction, m-material weight, Q-charge passing in the reaction, Mw-material molecular weight

### 4.2. Al practical energy per weight unit

Al electrode practical energy per weight unit is varying with the applied discharge currents. For example, for cell discharge current density of  $1.5 \text{ mA/cm}^2$ :

$$E(\text{energy per weight unit}) = \frac{V_{dvp} \cdot q}{m} = \frac{1.1 [V] \cdot 160 \cdot 10^{-3} [Ah]}{0.0762 \cdot 10^{-3} [Kg]} = 2,315 [Wh/Kg]$$

Where  $V_{dvp}$ - discharge voltage plateau, q-charge passing in the reaction, m-material weight

### 4.3. Cell practical energy per weight unit and per volume unit

Cell (including all active materials) practical energy per weight unit is varying with the applied discharge currents that expected for coin cell shown in Figure. 3S.

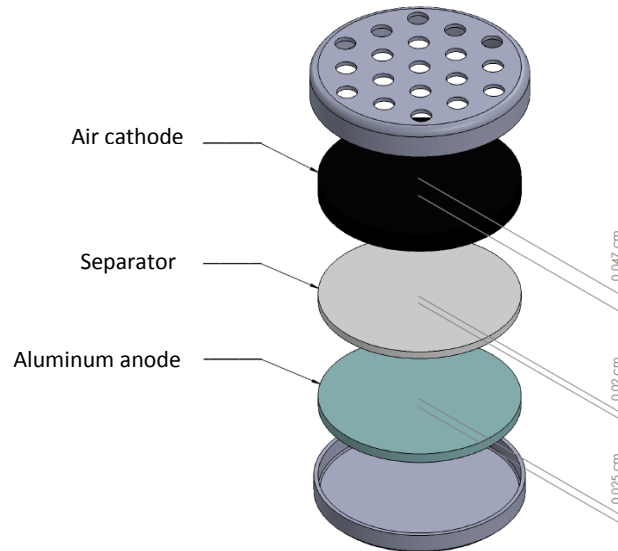

Figure. 3S. Schematic illustration of the cell components.

For example, for cell discharge current density of 1.5mA/cm<sup>2</sup>:

$$\begin{aligned} \mathbf{E}(\text{energy per weight unit}) &= \frac{V_{dvp} \cdot q}{m_A + m_{SS} + m_C} = \frac{1.1[V] \cdot 160 \cdot 10^{-3}[Ah]}{(0.0762 + 0.065 + 0.049) \cdot 10^{-3}[Kg]} = \\ &= 925[Wh/Kg] \end{aligned}$$

Where V<sub>dvp</sub>- discharge voltage plateau, q-charge passing in the reaction, m<sub>A</sub>- anode weight, m<sub>A</sub>- soaked with electrolyte separator weight, and m<sub>C</sub>- cathode weight.

$$\begin{aligned} \mathbf{E}(\text{energy per volume unit}) &= \frac{V_{dvp} \cdot q}{(t_A + t_{SS} + t_C) \cdot A} = \\ &= \frac{1.1[V] \cdot 160 \cdot 10^{-3}[Ah]}{(0.025[cm] + 0.02[cm] + 0.047[cm]) \cdot 1.13[cm^2]} = 1,692[Wh/l] \end{aligned}$$

Where V<sub>dvp</sub>- discharge voltage plateau, q-charge passing in the reaction, t<sub>A</sub>- anode thickness, t<sub>A</sub>- soaked with electrolyte separator thickness and t<sub>C</sub>- cathode thickness.
